# Supplementary material
Source: PubMed Central journal article supplement (PMC3929943)
Supplement: NIHMS539925-supplement-01.pdf [file NIHMS539925-supplement-01.pdf]

# THE LANCET **Neurology**

## Supplementary webappendix

This webappendix formed part of the original submission and has been peer reviewed. We post it as supplied by the authors.

Supplement to: Ginsberg MD, Palesch YY, Hill MD, et al, for the ALIAS and Neurological Emergencies Treatment Trials (NETT) Investigators. High-dose albumin treatment for acute ischaemic stroke (ALIAS) part 2: a randomised, double-blind, phase 3, placebo-controlled trial. *Lancet Neurol* 2013; published online Sept 27. [http://dx.doi.org/10.1016/S1474-4422\(13\)70223-0](http://dx.doi.org/10.1016/S1474-4422(13)70223-0).

## **Appendix**

### **Study Committees and Investigators**

#### **ALIAS Trial Executive Committee**

Myron D. Ginsberg, University of Miami, Miami, FL -- Study Chair and Principal Investigator, Clinical Coordinating Center;

Yuko Y. Palesch, Medical University of South Carolina, Charleston, SC -- Principal Investigator, Statistics and Data Coordinating Center;

Michael D. Hill, University of Calgary, Canada -- Director, Canadian Coordinating Center;

Bonnie D. Waldman, Medical University of South Carolina, Charleston, SC -- Project Manager;

Kristen M. Clasen (ex officio), Medical University of South Carolina, Charleston, SC -- Project Manager Assistant;

Richard Leinster, Medical University of South Carolina, Charleston, SC -- Data Manager;

Isabel Mendez, University of Miami, Miami, FL -- Financial Manager

Diego Tamariz, University of Miami, Miami, FL -- Clinical Project Coordinator;

Karla J. Ryckborst, University of Calgary, Calgary, Canada -- Study Coordinator;

Claudia S. Moy, NINDS, National Institutes of Health, Rockville, MD -- NINDS Project Scientist.

#### **Unblinded Study Statisticians**

Renee H. Martin, Medical University of South Carolina, Charleston, SC;

Sharon D. Yeatts, Medical University of South Carolina, Charleston, SC.

#### **External Safety Monitors**

Andrew M. Naidech, Northwestern University, Chicago;

Alejandro A. Rabinstein, Mayo Clinic, Rochester, MN.

#### **Data and Safety Monitoring Board**

Patrick D. Lyden, Cedars–Sinai Medical Center, Los Angeles, CA (Chair);

Christopher S. Coffey, University of Iowa, Iowa City, Iowa;

Marco Di Tullio, Columbia University, New York, NY;

Christine Wijman, Stanford University, Palo Alto, CA;

and Janice Cordell (ex officio), NINDS, National Institutes of Health, Rockville, MD.

## **PARTICIPATING CLINICAL SITES**

**[Site Principal Investigator, Primary Study Coordinator (number of subjects enrolled)]**

**[ \* denotes Neurological Emergency Treatment Trials (NETT) Network hub or spoke sites]**

### **UNITED STATES**

**Abington Memorial Hospital, Abington, PA\***: David Weisman, Jennifer McGowan Trainer (39);

**Memorial Hermann - Texas Medical Center, Houston, TX\***: Elizabeth Jones, Misty Ottman (36);

**University of Kentucky Medical Center, Lexington, KY\***: Roger Humphries, Linda Dechtenberg (33);

**Oregon Health and Science University, Portland, OR**: Wayne Clark, Darren Larsen (26);

**Mayo Clinic Hospital, Phoenix, AZ**: Maria Aguilar, Erica Boyd (24);

**New York Presbyterian / Columbia University Medical Center, New York City, NY\***: Stephan Mayer, Cristina Falo (22);

**Oregon Health and Science University - Providence Portland Medical Center, Portland, OR**:

Wayne Clark, Darren Larsen (18);

**Stanford University Medical Center, Stanford, CA\***: James Quinn, Stephanie Casal (18);

**Temple University Hospital, Philadelphia, PA\***: Nina Gentile, Brent Freeman (18);

**University of Florida - Shands Jacksonville Medical Center, Jacksonville, FL**: Scott Silliman, Mary Stegmaier (18);

**Buffalo General Medical Center, Buffalo, NY**: Robert Sawyer, Annemarie Crumlish (16);

**Detroit Receiving Hospital, Detroit, MI\***: Robert Welch, Valerie Mika (16);

**Grady Memorial Hospital, Atlanta, GA\***: David Wright, Andrea McDougal (16);

**Jackson Memorial Hospital, University of Miami, Miami, FL**: Sebastian Koch, Diego Tamariz (16);

**Froedtert Memorial Lutheran Hospital, Milwaukee, WI\***: Michel Torbey, Melissa Boettcher (15);

**San Francisco General Hospital, San Francisco, CA\***: Claude Hemphill, Michele Meeker (14);

**Emory University Hospital, Atlanta, GA\***: David Wright, Harriet Nevarez (12);

**Hennipin County Medical Center, Minneapolis, MN\***: Mustapha Ezzeddine, Kathleen Miller (12);

**Henry Ford Hospital, Detroit, MI\***: Christopher Lewandowski, Paula Crouse (12);

**Oregon Health and Science University - Providence St. Vincent Medical Center, Portland, OR**:

Wayne Clark, Barbara Dugan (11);

**University Hospital, Cincinnati, OH\***: Pooja Khatri, Irene Ewing (11);

**Virginia Commonwealth University / Medical College of Virginia, Richmond, VA\***: Warren Felton, Margot Lee (11);

**Sinai-Grace Hospital, Detroit, MI\***: Robert Welch, Valerie Mika (10);

**University of Maryland Medical Center, Baltimore, MD\***: Marcella Wozniak, Virginia Ganley (10);

**Hahnemann University Hospital, Philadelphia, PA\***: Mark Saks, Romy Nocera (9);

**University of North Carolina at Chapel Hill, Chapel Hill, NC:** Souvik Sen & David Huang; Sierra Marino (9);

**Baylor College of Medicine, Houston, TX:** Jose Suarez, Eusebia Calvillo (7);

**Beaumont Hospital, Royal Oak, Royal Oak, MI\*:** Robert Swor, LynnMarie Mango (7);

**El Camino Hospital Mountain View, Mountain View, CA\*:** Peter Fung, Rosen Mann (7);

**Intercoastal Neurology - Intercoastal Medical Research Center, Sarasota, FL:** Mauricio Concha, Jeanette Wilson (7);

**New York Methodist Hospital, Brooklyn, NY\*:** Robert Birkhahn, Paris Datillo (7);

**Bethesda North Hospital, Cincinnati, OH\*:** Pooja Khatri, Irene Ewing (6);

**Fairview Southdale Hospital, Edina, MN\*:** Mustapha Ezzeddine, Kathleen Miller (6);

**University of Pennsylvania Perelman School of Medicine, Philadelphia, PA:** Steven Messe, Maryliz Desanto (6);

**Loyola University Medical Center, Maywood, IL:** Rima Dafer & Michael Schneck, Linda Chadwick (5);

**University of California San Francisco Medical Center, San Francisco, CA\*:** Claude Hemphill, Michele Meeker (5);

**Upper Chesapeake Medical Center, Bel Air, MD\*:** Michael Abraham, Barbara Cysyk (5);

**Villages Research Group, Ocala, FL:** Gregory Howell, Sharon Howell (5);

**Yale University School of Medicine, New Haven, CT:** Joseph Schindler, Janet Halliday (5);

**California Pacific Medical Center - Pacific Campus, San Francisco, CA\*:** Nobi Barazangi, Jessica Redford (4);

**Good Samaritan Hospital, Cincinnati, OH\*:** Pooja Khatri, Irene Ewing (4);

**HealthEast Care System, St. Joseph's Hospital, St. Paul, MN:** Sandra Hanson, Amy Castle (4);

**Mercy Hospital of Buffalo, Buffalo, NY:** Catalina Ionata, Kathleen Parkes (4);

**Sacred Heart Medical Center, Springfield, OR:** Raymond Englander, Becky Hammerschmith (4);

**Saint Elizabeth South Hospital, Cincinnati, OH\*:** Pooja Khatri, Irene Ewing (4);

**University of Arizona Medical Center, Tucson, AZ\*:** Kurt Denninghoff, Ginny Stasinski (4);

**University of Minnesota Medical Center, Fairview, Minneapolis, MN\*:** Mustapha Ezzeddine, Kathleen Miller (4);

**Christiana Care - Christiana Hospital, Newark, DE\*:** Jason Nomura, Christy Poole (3);

**Metro Health Medical Center, Cleveland, OH:** Michael Bahntge, Scott Bailey (3);

**Neuroscience Institute - Florida Hospital Orlando, Orlando, FL:** Carlos Villar, Cherlynn Basignani (3);

**Oregon Health and Science University - Legacy Emanuel Medical Center, Portland, OR:** Wayne Clark, Darren Larsen (3);

**Saint Louis University, St. Louis, MO:** Salvador Cruz-Flores, Eve Holzemer (3);

**Winthrop-University Hospital, Mineola, NY\*:** Jay Yasen, Kim Byrnes (3);

**California Pacific Medical Center - Davies Campus, San Francisco, CA\*:** Nobi Barazangi, Jessica Redford (2);

**Duke University School of Medicine, Durham, NC:** Daniel Laskowitz, Ellen Bennett (2);

**John Muir Medical Center – Concord, Concord, CA:** Raymond Stephens, Peggy Newsom (2);

**Penn State Hershey Medical Center, Hershey, PA\*:** Thomas Terndrup, Deborah Hoffman (2);

**St. Elizabeth Healthcare – Florence, Florence, KY\*:** Pooja Khatri, Irene Ewing (2);

**The Christ Hospital, Cincinnati, OH\*:** Pooja Khatri, Irene Ewing (2);

**University of Pittsburgh Medical Center, Pittsburgh, PA:** Lawrence Wechsler, Sharon DeCesare (2);

**WakeMed Health and Hospitals, Raleigh, NC:** Keith Hull, Keisha Fuller (2);

**Atlantic Neuroscience Institute, Overlook Medical Center, Summit, NJ:** Shalini Bansil, Angela Brown (1);

**Mercy Fairfield Hospital, Cincinnati, OH\*:** Pooja Khatri, Irene Ewing (1);

**John Muir Medical Center - Walnut Creek, Walnut Creek, CA:** Raymond Stephens, Peggy Newsom (1);

**O'Connor Hospital, San Jose, CA\*:** Raul Guisado, Karen De La Cuesta (1);

**Ohio State University Wexner Medical Center, Columbus, OH:** Michel Torbey, April Spangler (1);

**Seton Medical Center Austin, Austin, TX:** Darryl Camp, Lisa Houy (1);

**UCLA Medical Center - Santa Monica, Los Angeles, CA:** Sidney Starkman, Judy Guzy (1);

**University Physicians Healthcare Hospital at Kino, Tucson, AZ\*:** Kurt Denninghoff, Ginny Stasinski (1).

## **CANADA**

**Foothills Hospital, University of Calgary, Calgary, AB:** Michael Hill, Karla Ryckborst (96);

**University of Alberta, Edmonton, AB:** Ashfaq Shuaib, Brenda Schwindt (25);

**Vancouver General Hospital, Vancouver, BC:** Phillip Teal, Nathalie Esplana (17);

**Centre de recherche de l'Hôpital Charles LeMoine, Greenfield Park, QC:** Jean-Martin Boulanger, Lise Blais (16);

**The Ottawa Hospital, Ottawa, ON:** Grant Stotts, Melodie Mortensen (13);

**University of Toronto, St. Michael's Hospital, Toronto, ON:** Neville Bayer & Daniel Selchen, Pawel Kostyrko (13);

**Royal Inland Hospital, Kamloops, BC:** Todd Collier, Lauren Kembel (10);

**Centre de Santé et de Services Sociaux de Chicoutimi, Saguenay (Chicoutimi), QC:** Michel Beaudry, Marie-Josée Chartrand (9);

**Trillium Health Centre, Mississauga, ON:** Daniel Selchen, Heather Hink (7);

**Grey Nuns Community Hospital, Edmonton, AB:** Brian Buck, Theresa Griffin-Stead (4);

**Queen Elizabeth II Health Sciences Centre, Halifax, NS:** Gord Gubitzi, Judith Jarrett (4);

**London Health Sciences Centre - University Hospital, London, ON:** Vladimir Hachinski, Kim Hesser (2);

**Thunder Bay Regional Health Sciences Centre, Thunder Bay, ON:** David Howse, Sandra Stoger (2).

### **FINLAND**

**Tampere University Hospital, Tampere:** Heikki Numminen, Anne Simi (4);

**Helsinki University Central Hospital, Helsinki:** Turgut Tatlisumak, Saija Eirola (1).

### **ISRAEL**

**Hadassah Medical Center - Hadassah University Hospital, Ein Kerem, Jerusalem:** Ronen Robert Leker, Ruth Paniri (4);

**Rambam Health Care Campus, Haifa:** Gregory Telman, Svetlana Afanasiev (4);

**Tel Aviv Sourasky Medical Center, Tel Aviv:** Hen Hallevi, Rotem Elimelech (4);

**Chaim Sheba Medical Center at Tel Hashomer, Tel Hashomer, Ramat Gan:** David Tanne, Meirav Izchak (1);

**Soroka Medical Center, Beersheba:** Gal Ifergane, Ruthie Bekore (1).
